# Supplementary material for: Green synthesis of zinc oxide nanoparticles using plant extract for catalysis applications
Source: Royal Society of Chemistry journal article supplement (doi:10.1039/d4nr03581j), 2024-10-07
Supplement: d4nr03581j1.pdf [file d4nr03581j1.pdf]

# Green synthesis of zinc oxide nanoparticles by using Plant extract for catalysis applications

Sreenivasulu Peta\* and Sadhana Singh<sup>a</sup>

<sup>\*,a</sup> Faculty of Chemical Sciences, Institute of Natural Sciences, Shri Ramswaroop Memorial University, Barabanki, 225 003, U.P, India. \*Email: [sreenivas.chm@srmu.ac.in](mailto:sreenivas.chm@srmu.ac.in).

## Synthesis of ZnO nanoparticles

In a typical green synthesis method, peeled oranges are washed and dried. Placed in a dryer for 12 hours until completely dry, and then ground to a moderate fine powder with a mortar and pestle. 1 g of powder is placed in a RB flask, then add 50 ml of water and stirred for 3 h. The mixture is placed in a water bath at 60°C for 60 minutes. Finally, the mixtures were filtered. 2 g of zinc nitrate was added to the 45 ml of extract. The mixture was placed in a water bath at 60 °C for 60 min with continues stirring. White precipitate can be observed; the white precipitate was separated by centrifugation, and then washed with deionized water followed by ethanol respectively to make it free from impurities. The precipitate was then dried at 100 °C and then heat treated at 400 °C for 1 h.

## Catalytic Reaction

The alkylation reaction was carried out in a round bottom reflux flask with a continuous flow of cold water and constant stirring. In a typical reaction study, 3 mmol of benzyl alcohol, 0.5 g of catalyst and 5 mL of acetonitrile are taken in a round bottom flask, and then 1 mmol of acetophenone is added drop wise. The temperature was increased to 100°C and this temperature was maintained for 4 hours. The reaction mass was then cooled to room temperature, after which the product was collected by filtration and analyzed by GC-MS.

## General Characterizations

The powder X-ray diffraction (XRD) patterns of the materials were recorded using a Rigaku D/Max 2550 X-ray diffractometer operating with Cu K $\alpha$  radiation ( $\lambda = 1.5418 \text{ \AA}$ ). The transmission electron microscope (TEM) images of the materials were obtained with a Topcon

002B TEM microscope operating at 200 kV. The scanning electron microscope (SEM) images of the materials were acquired using a Zeiss Sigma field emission SEM microscope (Model 8100).

The ex-situ FT-IR spectra of pyridine adsorbed samples were recorded on a ThermoElectron FTIR 560 spectrometer together with a MIRacle attenuated total reflectance (ATR) platform assembly and a Ge plate. The pyridine adsorption was carried out on an AutoChem 2920 II (Micromeritics). Prior to adsorption, the catalysts were heated in helium flow at 300 °C for 1 h to remove moisture.

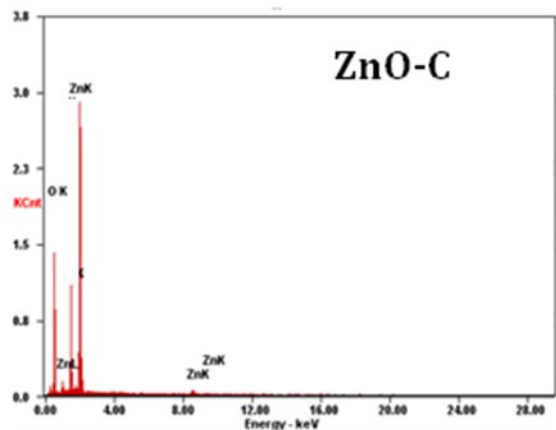

Fig. S1. EDX patterns of ZnO-C.

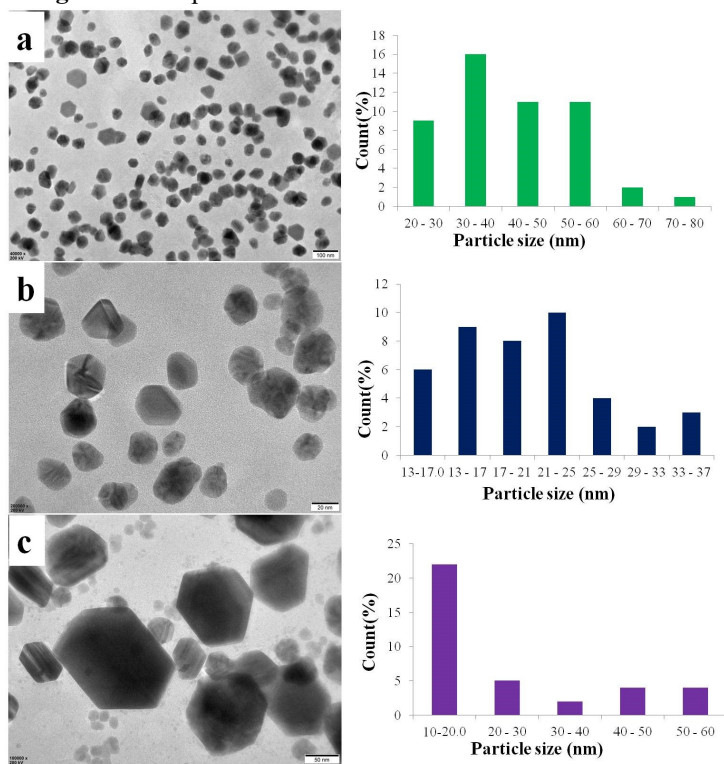

Fig. S2. a, b and c are the TEM images and particle size of ZnO-C, ZnO-H and ZnO-F materials

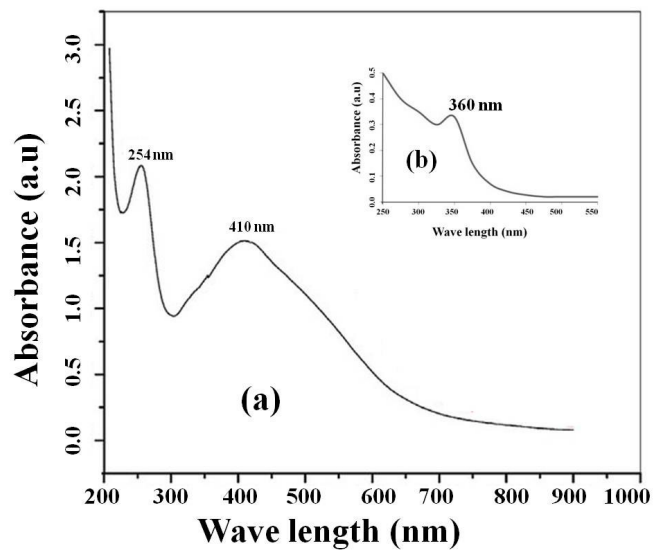

Fig. S3. UV-Vis graph of a) orange peel extract and b) ZnO-C

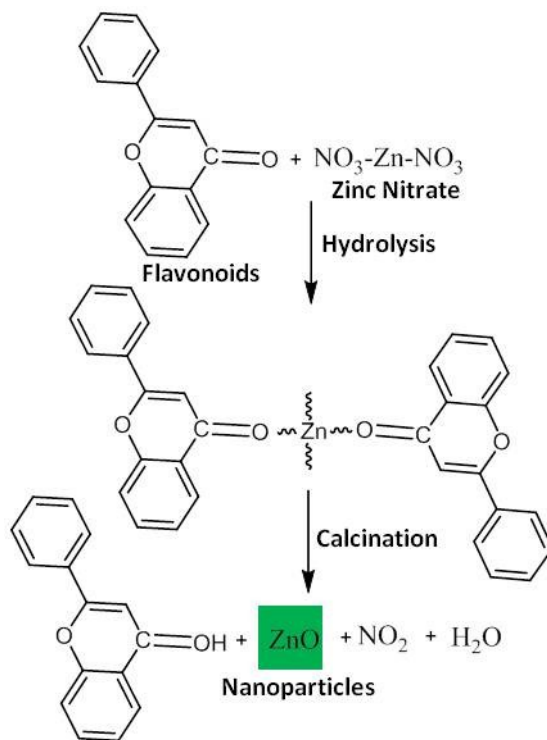

Fig. S4. The chemical mechanism of ZnO nanoparticle formation.

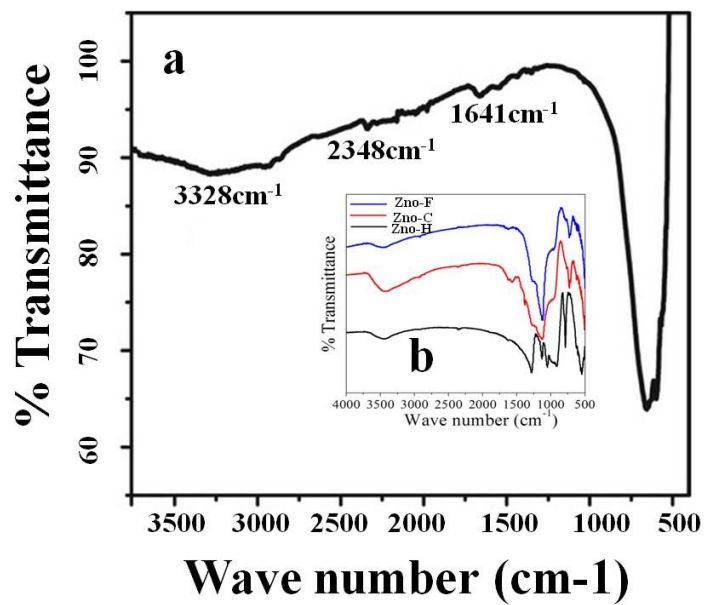

Fig. S5. FT-IR patterns of a) orange peel extract and b) ZnO-C

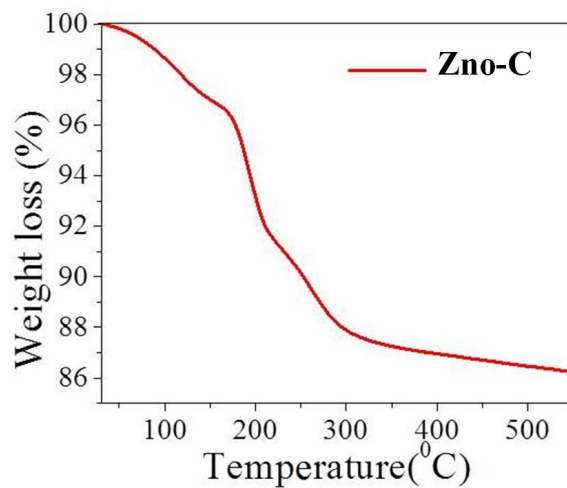

Fig. S6. Typical TGA pattern of Citrus Sinensis synthesized ZnO-C(Before calcination).

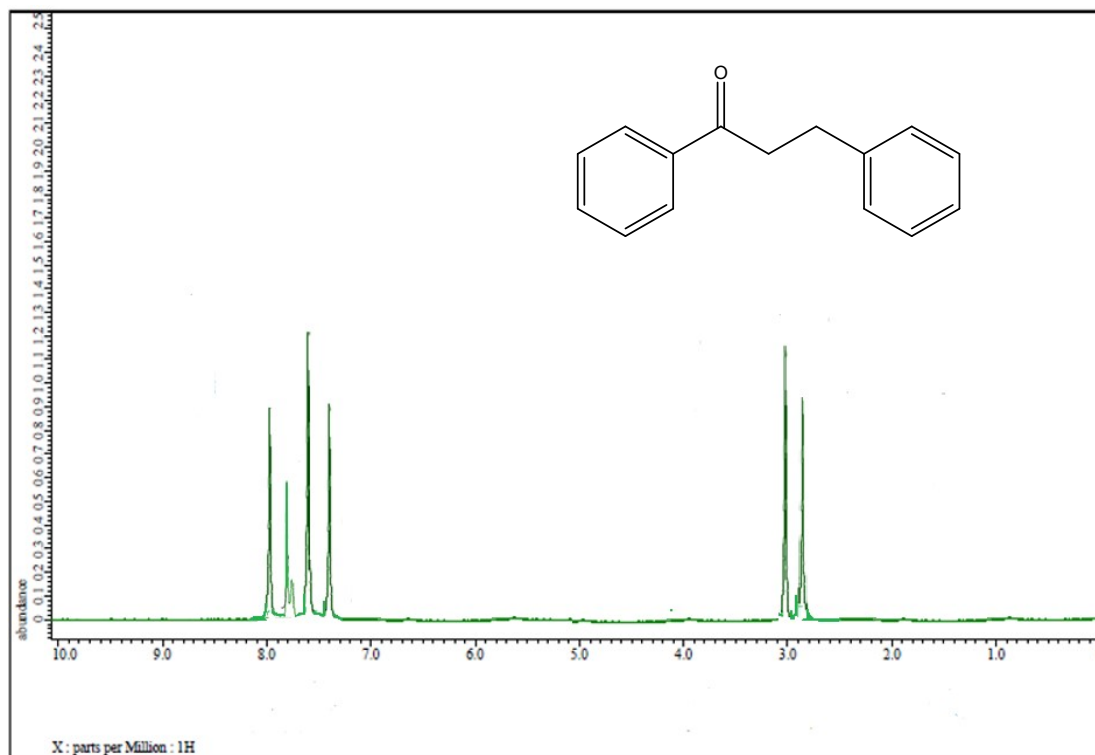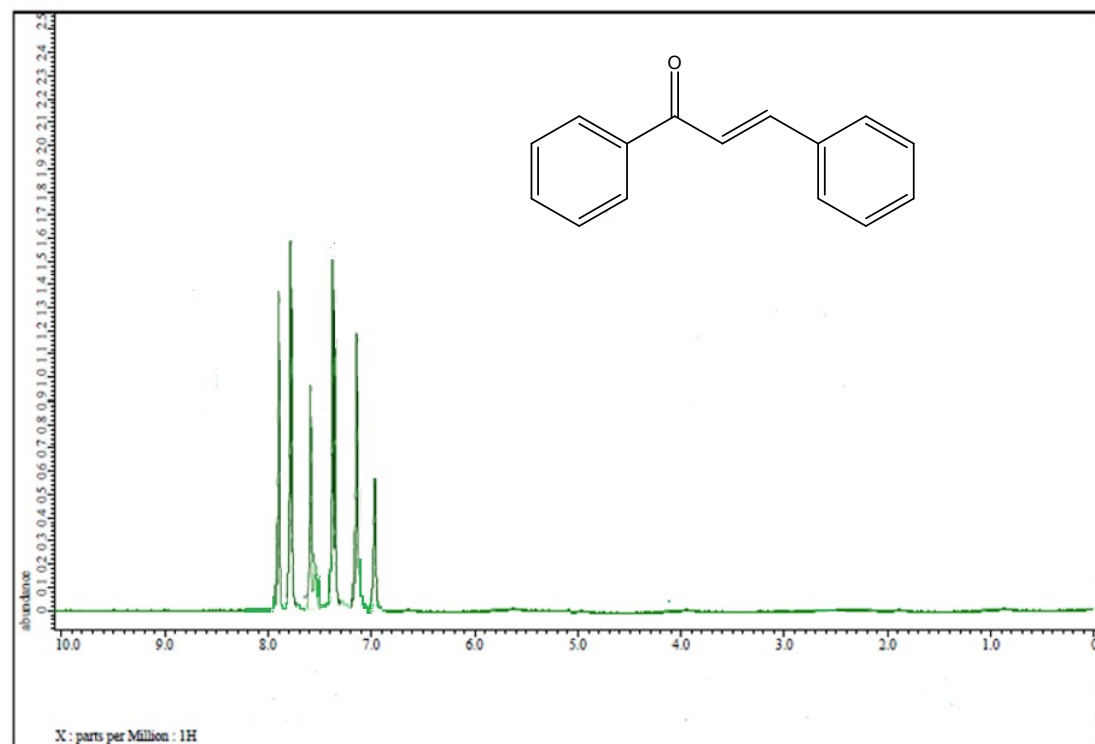

Fig. S7 NMR spectra of products

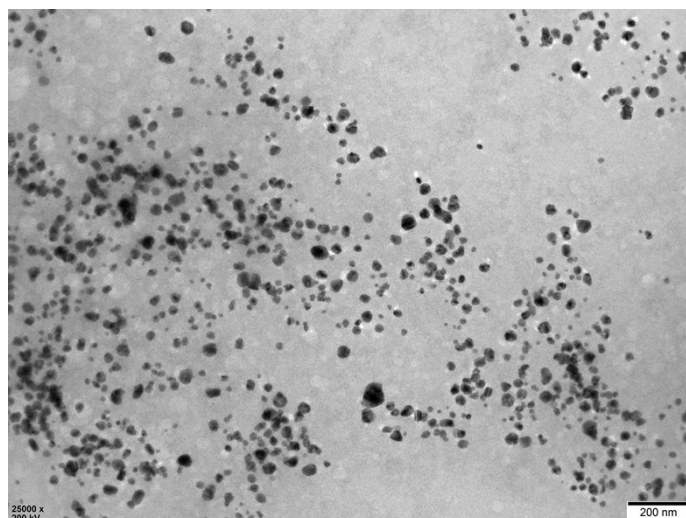

**Fig. S8** TEM image of spent material of ZnO-C

**Table S1.** Comparison of the catalytic performances of ZnO catalysts in acetophenone alkylation with other reported catalysts for the same reaction.

| S.No | Catalyst                                            | Base                                 | Temperature (°C) | Time(h) | Yield (%) <sup>1</sup> , 3diphenyl prope-1one | Conversion based on | Ref          |
|------|-----------------------------------------------------|--------------------------------------|------------------|---------|-----------------------------------------------|---------------------|--------------|
| 1    | (iPr-PNP)Mn(H)(CO) <sub>2</sub>                     | tBuOK                                | 125              | 18      | 98                                            | Benzyl alcohol      | S1           |
| 2    | Ni/SiO <sub>2</sub> -Al <sub>2</sub> O <sub>3</sub> | K <sub>3</sub> PO <sub>4</sub>       | 175              | 14.5    | 86                                            | Benzyl alcohol      | S2           |
| 3    | Nano-Fe <sub>2</sub> O <sub>3</sub>                 | t-ButOK                              | 135              | 24      | 97                                            | --                  | S3           |
| 4    | Cu/CuOx 250                                         | K <sub>3</sub> PO <sub>4</sub> (0.5) | 170              | 12      | 93                                            | Acetophenone        | S4           |
| 5    | CeO <sub>2</sub>                                    | --                                   | 150              | 6       | 14                                            | Acetophenone        | S5           |
| 6    | ZnO-C                                               | ----                                 | 100              | 4       | 80                                            | Acetophenone        | Present work |
| 7    | ZnO-C(used catalyst)                                | ----                                 | 100              | 4       | 78                                            | Acetophenone        | Present work |

S2 A. Charvieux, J. B. Giorgi, N. Duguet, and E. Métay, *Green Chem.*, 2018,20,4210-4216.

S3. M. Nallagangula, C. Sujatha, V. T. Bhat and K. Namitharan, *Chem. Commun.*, 2019, 55, 8490—8493.

S4. D. Yang, H. Wang, and C. -R. Chang, *Org. Biomol. Chem.*, 2024, 22, 970-975.

S5 Z. Zhang, Y. Wang, M. Wang, J. Lu, C. Zhang, L. Li, J. Jiang, and F. Wang, *Catal. Sci. Technol.*, 2016, **6**, 1693-1700.
